# Supplementary material for: Plant-Programmed Cell Death-Associated Genes Participation in Pinus sylvestris L. Trunk Tissue Formation
Source: MDPI journal article supplement (doi:10.3390/plants11243438), 2022-12-09
Supplement: s1 [file s1]

Supplementary Material

# Plant Programmed Cell Death Associated Genes Participation in *Pinus sylvestris* L. Trunk Tissues Formation

Moshchenskaya Yu.L.<sup>1\*</sup>, Galibina N.A.<sup>1</sup>, Nikerova K.M.<sup>1</sup>, Tarelkina T.V.<sup>1</sup>, Korzhenevsky M.A.<sup>1</sup>, Sofronova I.N.<sup>1</sup>, Ershova M.A.<sup>1</sup>, Semenova L.I.<sup>1</sup>

Forest Research Institute, Karelian Research Centre of the Russian Academy of Sciences, 11 Pushkinskayast., Petrozavodsk, Russia, 185910; tselishcheva.yulia@mail.ru (Y.L.M.); galibina@krc.karelia.ru (N.A.G.); er-shova.maria@krc.karelia.ru (M.A.E); knikerova@yandex.ru (K.M.N.); karelina.t.v@gmail.com (T.V.T.); mkorz@krc.karelia.ru (M.A.K.); irinasof@krc.karelia.ru (I.N.S.); mi7enova@gmail.com (L.I.S.).

\* Correspondence: tselishcheva.yulia@mail.ru; Tel.: +7(8142)768160

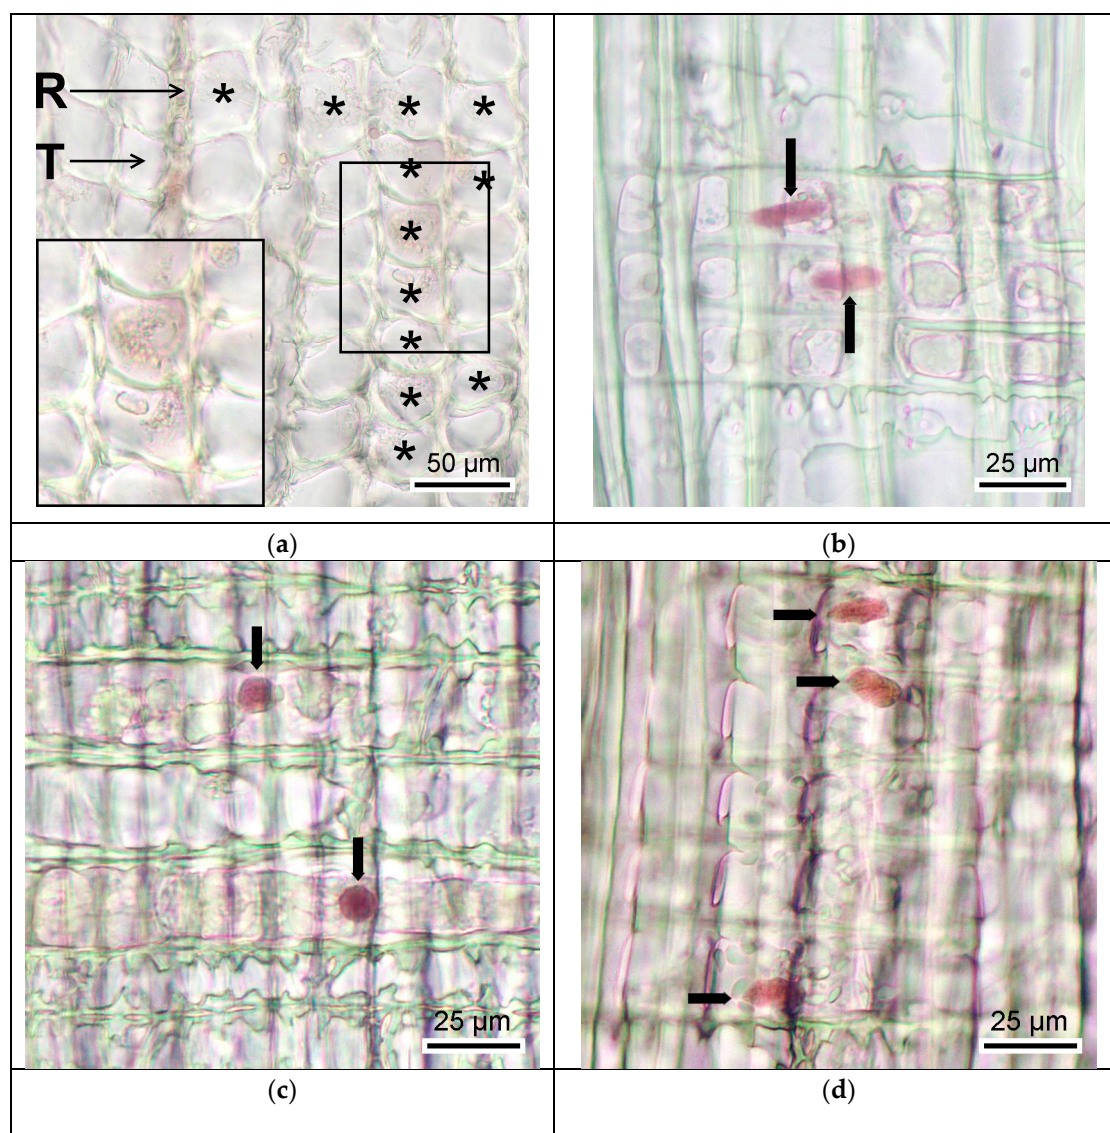

**Supplementary Figure S1.** (a) Transverse section of differentiating xylem (Fraction 2). R - ray, T - tracheid. The cellular contents in differentiating tracheids are visible (shown with asterisks). In the inset, two cells are shown at higher magnification. (b) Radial section of differentiating xylem (Fraction 2). The nuclei in the ray parenchyma cells are oblong-elliptical (black arrows). (c) Radial section of inner sapwood (SWin). The nuclei in the ray parenchyma cells display evident pycnotic

degeneration. They are rounded due to water loss and chromatin condensation (black arrows). **(d)** Radial section of transition zone (TZ). The destruction of the nuclear membranes occurs. Chromatin stained with acetocarmine can be observed in cells (black arrows).
